# Supplementary material for: A novel sub-epidemic modeling framework for short-term forecasting epidemic waves
Source: BMC Med. 2019 Aug 22;17:164. doi: 10.1186/s12916-019-1406-6 (PMC6704534; doi:10.1186/s12916-019-1406-6)
Supplement: Supplementary file 1 — Incidence outbreak data for three real outbreaks. Daily number of new SARS cases by date of symptoms onset of the 2003 SARS outbreak in Singapore as explained in the text, weekly incidence curve according to the date of symptoms onset for the second wave of the ongoing Ebola outbreak in the DRC from the WHO Situation Reports and Disease Outbreak News covering the reporting period: September 2018 to mid-April 2019 as explained in the text, and weekly incidence curve of the 2017 plague epidemic in Madagascar as explained in the text. (XLS 32 kb) [file 12916_2019_1406_MOESM1_ESM.xls]

## Sheet: SARS outbreak in Singapore
Days	Incidence
0	2
1	0
2	0
3	1
4	0
5	0
6	0
7	1
8	1
9	1
10	5
11	3
12	5
13	5
14	3
15	1
16	0
17	6
18	13
19	14
20	11
21	8
22	8
23	3
24	5
25	1
26	1
27	5
28	4
29	3
30	3
31	1
32	5
33	2
34	8
35	1
36	6
37	8
38	12
39	11
40	6
41	4
42	6
43	7
44	1
45	9
46	4
47	5
48	4
49	1
50	5
51	3
52	3
53	2
54	0
55	4
56	2
57	1
58	1
59	1
60	0
61	1
62	0
63	0
64	0
65	0
66	0
67	0
68	0
69	1

## Sheet: Plague outbreak in Madagascar
Weeks	Incidence
0	5
1	6
2	5
3	6
4	11
5	11
6	29
7	34
8	45
9	64
10	67
11	61
12	59
13	69
14	74
15	70
16	70
17	80
18	68
19	54
20	74
21	47
22	58
23	42
24	63
25	44
26	31
27	33
28	40
29	28
30	44
31	43
32	29
33	32
34	32
35	19
36	17
37	32
38	10
39	30
40	17
41	17
42	18
43	24
44	13
45	11
46	3
47	3
48	1
49	0

## Sheet: Ebola outbreak in DRC
Weeks	Incidence
0	6
1	13
2	11
3	28
4	27
5	27
6	42
7	33
8	40
9	27
10	48
11	26
12	57
13	40
14	33
15	30
16	28
17	29
18	41
19	39
20	45
21	29
22	25
23	25
24	23
25	33
26	36
27	58
28	73
29	69
30	33
31	24
